# Supplementary material for: Metalworking fluids and cancer mortality in a US autoworker cohort (1941–2015)
Source: PubMed Central journal article supplement (PMC7737797; doi:10.5271/sjweh.3898), 2020-09-01
Supplement: SJWEH-46-525-S001.pdf [file SJWEH-46-525-S001.pdf]

# Metalworking fluids and cancer mortality in a US autoworker cohort (1941–2015)<sup>1</sup>

by Sadie Costello, PhD,<sup>2</sup> Kevin Chen, MPH, Sally Picciotto, PhD, Liza Lutzker, MPH, Ellen Eisen, ScD

1. Appendix
2. Correspondence to: Sadie Costello, PhD, Environmental Health Science, School of Public Health, University of California, Berkeley, 2121 Berkeley Way #5302, Berkeley, CA 94720-7360, USA. [E-mail: Sadie@berkeley.edu]

Table S1. International Classification of Diseases (ICD) codes used to define cases. Deaths prior to 1999 were defined with respect to the 9<sup>th</sup> revision. Deaths in or after 1999 were defined with respect to the 10<sup>th</sup>.

| Cause of death                            | ICD 9                                       | ICD 10                                                                                                                                |
|-------------------------------------------|---------------------------------------------|---------------------------------------------------------------------------------------------------------------------------------------|
| All causes                                | –                                           | –                                                                                                                                     |
| All natural causes                        | 001–799                                     | A00–R99, U00–Z99                                                                                                                      |
| All cancers                               | 140–239                                     | C00–C99, D00–D49                                                                                                                      |
| Esophageal cancer                         | 150                                         | C15                                                                                                                                   |
| Stomach cancer                            | 151                                         | C16                                                                                                                                   |
| Intestinal cancer                         | 152–153                                     | C17–C18                                                                                                                               |
| Rectal cancer                             | 154                                         | C19–C21                                                                                                                               |
| Kidney cancer                             | 189.0, 189.2                                | C64–C66                                                                                                                               |
| Bladder and urinary organ cancers         | 188, 189.3–189.9                            | C67–C68                                                                                                                               |
| Bile duct, liver, and gallbladder cancers | 155–156                                     | C22–C24                                                                                                                               |
| Pancreatic cancer                         | 157                                         | C25                                                                                                                                   |
| Laryngeal cancer                          | 161                                         | C32                                                                                                                                   |
| Lung cancer                               | 162                                         | C33–C34                                                                                                                               |
| Skin cancer                               | 172–173                                     | C43–C44, C46.0, C46.9                                                                                                                 |
| Prostate cancer                           | 185                                         | C61                                                                                                                                   |
| Brain and nervous system cancers          | 191–192                                     | C47, C70–C72                                                                                                                          |
| Leukemia                                  | 204–208                                     | C91.0–C91.3, C91.5–C91.9, C92–C95                                                                                                     |
| Breast cancer                             | 174–175                                     | C50                                                                                                                                   |
| All nonmalignant respiratory diseases     | 460–466, 470–478, 480–487, 490–495, 496–519 | A48.1, J00–J01, J02.8–J02.9, J03.8–J03.9, J04–J06, J10–J18, J20–J22, J40–J46, J30–J33, J34.1–J34.8, J35–J39, J47, J60:J95, J98, R09.1 |
| Chronic obstructive pulmonary disease     | 490–492, 496                                | J40–J44                                                                                                                               |
| Pneumonia                                 | 480–486                                     | A48.1, J12–J18                                                                                                                        |

|                                           |                                            |                                                                                                        |
|-------------------------------------------|--------------------------------------------|--------------------------------------------------------------------------------------------------------|
| Cirrhosis and other chronic liver disease | 571                                        | K70, K73–K74, K76.0                                                                                    |
| All heart diseases                        | 390–398, 402, 404, 410–414, 420–429        | I00–I09, I11–I13, I20–I22, I24–I25, I30–I38, I40, I42, I44–I52, I97.0–I97.1, I97.8–I97.9, R00.1, R00.8 |
| Ischemic heart disease                    | 410–414                                    | I20–I22, I24–I25, I51.3, I51.6                                                                         |
| Rheumatic heart disease                   | 390–398                                    | I00–I09                                                                                                |
| Cerebrovascular disease                   | 430–438                                    | G45.0–G45.2, G45.4–G45.9, I60–I69                                                                      |
| All external causes                       | E800–E848, E850–E888, E929–E978, E980–E999 | V00–V99, W00–W99, X00–X84, X85–X99, Y00–Y36, Y40–Y89                                                   |

Table S2. Cox model estimates of the hazard ratio for selected cancer outcomes associated with exposure to straight metalworking fluids, controlling for other fluid types, calendar year, calendar year of hire, age, race, sex, and plant.

|                               |                          | Number of cases | HR  | 95% CI      |
|-------------------------------|--------------------------|-----------------|-----|-------------|
| Laryngeal cancer (73 cases)   |                          |                 |     |             |
| 0                             | mg/m <sup>3</sup> ·years | 40              | 1.0 | –           |
| > 0 to 0.5                    | mg/m <sup>3</sup> ·years | 17              | 1.1 | (0.59–2.37) |
| > 0.5                         | mg/m <sup>3</sup> ·years | 16              | 0.8 | (0.41–1.59) |
| Lung cancer (1891 cases)      |                          |                 |     |             |
| 0                             | mg/m <sup>3</sup> ·years | 964             | 1.0 | –           |
| > 0 to 0.3                    | mg/m <sup>3</sup> ·years | 309             | 1.0 | (0.92–1.25) |
| > 0.3 to 1.6                  | mg/m <sup>3</sup> ·years | 309             | 0.9 | (0.82–1.12) |
| > 1.6                         | mg/m <sup>3</sup> ·years | 309             | 0.9 | (0.78–1.05) |
| Esophageal cancer (176 cases) |                          |                 |     |             |
| 0                             | mg/m <sup>3</sup> ·years | 83              | 1.0 | –           |
| > 0 to 0.4                    | mg/m <sup>3</sup> ·years | 31              | 1.1 | (0.71–1.91) |
| > 0.4 to 2.1                  | mg/m <sup>3</sup> ·years | 32              | 1.1 | (0.74–1.92) |
| > 2.1                         | mg/m <sup>3</sup> ·years | 30              | 1.1 | (0.73–1.85) |

|                               |                          |     |     |             |    |
|-------------------------------|--------------------------|-----|-----|-------------|----|
| Stomach cancer (192 cases)    |                          |     |     |             |    |
| 0                             | mg/m <sup>3</sup> ·years | 103 | 1.0 | –           |    |
|                               |                          |     | 0   |             |    |
| > 0 to 0.3                    | mg/m <sup>3</sup> ·years | 30  | 1.1 | (0.70–1.91) |    |
|                               |                          |     | 6   |             |    |
| > 0.3 to 2.9                  | mg/m <sup>3</sup> ·years | 29  | 0.8 | (0.49–1.32) |    |
|                               |                          |     | 0   |             |    |
| > 2.9                         | mg/m <sup>3</sup> ·years | 30  | 1.8 | (1.17–2.97) | ⌊* |
|                               |                          |     | 6   |             |    |
| Colon cancer (407 cases)      |                          |     |     |             |    |
| 0                             | mg/m <sup>3</sup> ·years | 211 | 1.0 | –           |    |
|                               |                          |     | 0   |             |    |
| > 0 to 0.5                    | mg/m <sup>3</sup> ·years | 66  | 0.8 | (0.64–1.23) |    |
|                               |                          |     | 9   |             |    |
| > 0.5 to 2.1                  | mg/m <sup>3</sup> ·years | 65  | 0.9 | (0.67–1.29) |    |
|                               |                          |     | 3   |             |    |
| > 2.1                         | mg/m <sup>3</sup> ·years | 65  | 0.9 | (0.68–1.25) |    |
|                               |                          |     | 2   |             |    |
| Rectal cancer (83 cases)      |                          |     |     |             |    |
| 0                             | mg/m <sup>3</sup> ·years | 44  | 1.0 | –           |    |
|                               |                          |     | 0   |             |    |
| > 0 to 1                      | mg/m <sup>3</sup> ·years | 20  | 0.7 | (0.40–1.51) |    |
|                               |                          |     | 8   |             |    |
| > 1                           | mg/m <sup>3</sup> ·years | 19  | 0.8 | (0.47–1.68) |    |
|                               |                          |     | 9   |             |    |
| Bladder cancer (138 cases)    |                          |     |     |             |    |
| 0                             | mg/m <sup>3</sup> ·years | 73  | 1.0 | –           |    |
|                               |                          |     | 0   |             |    |
| > 0 to 0.3                    | mg/m <sup>3</sup> ·years | 20  | 0.9 | (0.51–1.61) |    |
|                               |                          |     | 0   |             |    |
| > 0.3 to 1.8                  | mg/m <sup>3</sup> ·years | 22  | 0.6 | (0.37–1.13) |    |
|                               |                          |     | 5   |             |    |
| > 1.8                         | mg/m <sup>3</sup> ·years | 23  | 0.7 | (0.42–1.16) |    |
|                               |                          |     | 0   |             |    |
| Liver cancer (123 cases)      |                          |     |     |             |    |
| 0                             | mg/m <sup>3</sup> ·years | 55  | 1.0 | –           |    |
|                               |                          |     | 0   |             |    |
| > 0 to 0.5                    | mg/m <sup>3</sup> ·years | 22  | 1.0 | (0.58–1.89) |    |
|                               |                          |     | 5   |             |    |
| > 0.5 to 1.6                  | mg/m <sup>3</sup> ·years | 23  | 1.9 | (1.09–3.31) | ⌊* |
|                               |                          |     | 0   |             |    |
| > 1.6                         | mg/m <sup>3</sup> ·years | 23  | 1.2 | (0.72–2.13) |    |
|                               |                          |     | 4   |             |    |
| Pancreatic cancer (315 cases) |                          |     |     |             |    |
| 0                             | mg/m <sup>3</sup> ·years | 154 | 1.0 | –           |    |
|                               |                          |     | 0   |             |    |

|                                                     |              |                          |     |          |             |    |
|-----------------------------------------------------|--------------|--------------------------|-----|----------|-------------|----|
|                                                     | > 0 to 0.3   | mg/m <sup>3</sup> ·years | 54  | 1.2<br>5 | (0.87–1.81) |    |
|                                                     | > 0.3 to 1.1 | mg/m <sup>3</sup> ·years | 53  | 1.1<br>7 | (0.80–1.70) |    |
|                                                     | > 1.1        | mg/m <sup>3</sup> ·years | 54  | 0.8<br>5 | (0.60–1.21) |    |
| <b>Skin cancer (69 cases)</b>                       |              |                          |     |          |             |    |
|                                                     | 0            | mg/m <sup>3</sup> ·years | 32  | 1.0<br>0 | –           |    |
|                                                     | > 0 to 0.9   | mg/m <sup>3</sup> ·years | 18  | 1.1<br>7 | (0.58–2.34) |    |
|                                                     | > 0.9        | mg/m <sup>3</sup> ·years | 19  | 1.3<br>2 | (0.67–2.58) |    |
| <b>Prostate cancer (417 cases)</b>                  |              |                          |     |          |             |    |
|                                                     | 0            | mg/m <sup>3</sup> ·years | 192 | 1.0<br>0 | –           |    |
|                                                     | > 0 to 0.5   | mg/m <sup>3</sup> ·years | 75  | 1.1<br>5 | (0.84–1.57) |    |
|                                                     | > 0.5 to 2   | mg/m <sup>3</sup> ·years | 75  | 1.1<br>1 | (0.81–1.52) |    |
|                                                     | > 2          | mg/m <sup>3</sup> ·years | 75  | 1.0<br>5 | (0.78–1.41) |    |
| <b>Brain and nervous system cancers (128 cases)</b> |              |                          |     |          |             |    |
|                                                     | 0            | mg/m <sup>3</sup> ·years | 74  | 1.0<br>0 | –           |    |
|                                                     | > 0 to 1     | mg/m <sup>3</sup> ·years | 27  | 0.6<br>1 | (0.35–1.05) |    |
|                                                     | > 1          | mg/m <sup>3</sup> ·years | 27  | 0.7<br>3 | (0.44–1.22) |    |
| <b>Leukemia (200 cases)</b>                         |              |                          |     |          |             |    |
|                                                     | 0            | mg/m <sup>3</sup> ·years | 100 | 1.0<br>0 | –           |    |
|                                                     | > 0 to 0.3   | mg/m <sup>3</sup> ·years | 34  | 1.0<br>9 | (0.69–1.75) |    |
|                                                     | > 0.3 to 2.3 | mg/m <sup>3</sup> ·years | 33  | 0.7<br>7 | (0.48–1.23) |    |
|                                                     | > 2.3        | mg/m <sup>3</sup> ·years | 33  | 0.9<br>4 | (0.60–1.48) |    |
| <b>Breast cancer (76 cases)</b>                     |              |                          |     |          |             |    |
|                                                     | 0            | mg/m <sup>3</sup> ·years | 43  | 1.0<br>0 | –           |    |
|                                                     | > 0 to 0.7   | mg/m <sup>3</sup> ·years | 16  | 1.3<br>4 | (0.64–2.82) |    |
|                                                     | > 0.7        | mg/m <sup>3</sup> ·years | 17  | 2.1<br>3 | (1.04–4.39) | ⊥* |

Table S3. Cox model estimates of the hazard ratio for selected cancer outcomes associated with exposure to soluble metalworking fluids, controlling for other fluid types, calendar year, calendar year of hire, age, race, sex, and plant.

|                               |                          | Number of cases | HR  | 95% CI      |
|-------------------------------|--------------------------|-----------------|-----|-------------|
| Laryngeal cancer (73 cases)   |                          |                 |     |             |
| 0 to 0.05                     | mg/m <sup>3</sup> ·years | 18              | 1.0 | –           |
| > 0.05 to 7.3                 | mg/m <sup>3</sup> ·years | 28              | 0.7 | (0.39–1.58) |
| > 7.3                         | mg/m <sup>3</sup> ·years | 27              | 0.8 | (0.42–1.83) |
| Lung cancer (1891 cases)      |                          |                 |     |             |
| 0 to 0.05                     | mg/m <sup>3</sup> ·years | 432             | 1.0 | –           |
| > 0.05 to 3.3                 | mg/m <sup>3</sup> ·years | 487             | 0.9 | (0.84–1.12) |
| > 3.3 to 11.2                 | mg/m <sup>3</sup> ·years | 486             | 0.9 | (0.77–1.04) |
| > 11.2                        | mg/m <sup>3</sup> ·years | 486             | 1.0 | (0.85–1.17) |
| Esophageal cancer (176 cases) |                          |                 |     |             |
| 0 to 0.05                     | mg/m <sup>3</sup> ·years | 34              | 1.0 | –           |
| > 0.05 to 3.3                 | mg/m <sup>3</sup> ·years | 46              | 1.0 | (0.64–1.74) |
| > 3.3 to 10.8                 | mg/m <sup>3</sup> ·years | 47              | 1.0 | (0.62–1.74) |
| > 10.8                        | mg/m <sup>3</sup> ·years | 49              | 1.1 | (0.68–2.04) |
| Stomach cancer (192 cases)    |                          |                 |     |             |
| 0 to 0.05                     | mg/m <sup>3</sup> ·years | 58              | 1.0 | –           |
| > 0.05 to 4.2                 | mg/m <sup>3</sup> ·years | 45              | 0.6 | (0.42–1.07) |
| > 4.2 to 10                   | mg/m <sup>3</sup> ·years | 44              | 1.0 | (0.66–1.74) |
| > 10                          | mg/m <sup>3</sup> ·years | 45              | 0.7 | (0.42–1.18) |
| Colon cancer (407 cases)      |                          |                 |     |             |
| 0 to 0.05                     | mg/m <sup>3</sup> ·years | 80              | 1.0 | –           |
| > 0.05 to 3.5                 | mg/m <sup>3</sup> ·years | 109             | 1.1 | (0.83–1.57) |
| > 3.5 to 12                   | mg/m <sup>3</sup> ·years | 109             | 0.9 | (0.69–1.35) |

|                               |               |                          |     |          |             |    |
|-------------------------------|---------------|--------------------------|-----|----------|-------------|----|
|                               | > 12          | mg/m <sup>3</sup> ·years | 109 | 0.9<br>4 | (0.66–1.33) |    |
| Rectal cancer (83 cases)      |               |                          |     |          |             |    |
|                               | 0 to 0.05     | mg/m <sup>3</sup> ·years | 20  | 1.0<br>0 | –           |    |
|                               | > 0.05 to 4.6 | mg/m <sup>3</sup> ·years | 19  | 0.8<br>5 | (0.41–1.76) |    |
|                               | > 4.6 to 8.6  | mg/m <sup>3</sup> ·years | 23  | 2.1<br>8 | (1.07–4.48) | ⌊* |
|                               | > 8.6         | mg/m <sup>3</sup> ·years | 21  | 0.8<br>6 | (0.40–1.84) |    |
| Bladder cancer (138 cases)    |               |                          |     |          |             |    |
|                               | 0 to 0.05     | mg/m <sup>3</sup> ·years | 26  | 1.0<br>0 | –           |    |
|                               | > 0.05 to 3.7 | mg/m <sup>3</sup> ·years | 37  | 1.1<br>0 | (0.63–1.91) |    |
|                               | > 3.7 to 11.1 | mg/m <sup>3</sup> ·years | 36  | 1.1<br>8 | (0.67–2.07) |    |
|                               | > 11.1        | mg/m <sup>3</sup> ·years | 39  | 1.1<br>3 | (0.63–2.02) |    |
| Liver cancer (123 cases)      |               |                          |     |          |             |    |
|                               | 0 to 0.05     | mg/m <sup>3</sup> ·years | 22  | 1.0<br>0 | –           |    |
|                               | > 0.05 to 2.3 | mg/m <sup>3</sup> ·years | 34  | 1.2<br>9 | (0.71–2.33) |    |
|                               | > 2.3 to 9.2  | mg/m <sup>3</sup> ·years | 32  | 0.7<br>6 | (0.41–1.40) |    |
|                               | > 9.2         | mg/m <sup>3</sup> ·years | 35  | 0.9<br>3 | (0.50–1.74) |    |
| Pancreatic cancer (315 cases) |               |                          |     |          |             |    |
|                               | 0 to 0.05     | mg/m <sup>3</sup> ·years | 70  | 1.0<br>0 | –           |    |
|                               | > 0.05 to 3.4 | mg/m <sup>3</sup> ·years | 82  | 0.8<br>1 | (0.56–1.16) |    |
|                               | > 3.4 to 9.3  | mg/m <sup>3</sup> ·years | 81  | 0.9<br>2 | (0.63–1.34) |    |
|                               | > 9.3         | mg/m <sup>3</sup> ·years | 82  | 0.8<br>0 | (0.54–1.19) |    |
| Skin cancer (69 cases)        |               |                          |     |          |             |    |
|                               | 0 to 0.05     | mg/m <sup>3</sup> ·years | 15  | 1.0<br>0 | –           |    |
|                               | > 0.05 to 4.7 | mg/m <sup>3</sup> ·years | 26  | 1.6<br>9 | (0.77–3.70) |    |
|                               | > 4.7         | mg/m <sup>3</sup> ·years | 28  | 1.6<br>4 | (0.71–3.80) |    |
| Prostate cancer (417 cases)   |               |                          |     |          |             |    |

|                                              |               |                          |     |     |             |
|----------------------------------------------|---------------|--------------------------|-----|-----|-------------|
|                                              | 0 to 0.05     | mg/m <sup>3</sup> ·years | 68  | 1.0 | –           |
|                                              | > 0.05 to 5.1 | mg/m <sup>3</sup> ·years | 117 | 0.7 | (0.54–1.05) |
|                                              | > 5.1 to 15.6 | mg/m <sup>3</sup> ·years | 116 | 0.7 | (0.57–1.11) |
|                                              | > 15.6        | mg/m <sup>3</sup> ·years | 116 | 0.8 | (0.57–1.14) |
| Brain and nervous system cancers (128 cases) |               |                          |     |     |             |
|                                              | 0 to 0.05     | mg/m <sup>3</sup> ·years | 32  | 1.0 | –           |
|                                              | > 0.05 to 2.7 | mg/m <sup>3</sup> ·years | 32  | 1.5 | (0.86–2.65) |
|                                              | > 2.7 to 9.2  | mg/m <sup>3</sup> ·years | 32  | 1.4 | (0.82–2.68) |
|                                              | > 9.2         | mg/m <sup>3</sup> ·years | 32  | 1.5 | (0.82–2.90) |
| Leukemia (200 cases)                         |               |                          |     |     |             |
|                                              | 0 to 0.05     | mg/m <sup>3</sup> ·years | 48  | 1.0 | –           |
|                                              | > 0.05 to 3.3 | mg/m <sup>3</sup> ·years | 51  | 1.0 | (0.65–1.64) |
|                                              | > 3.3 to 9.7  | mg/m <sup>3</sup> ·years | 50  | 1.0 | (0.67–1.76) |
|                                              | > 9.7         | mg/m <sup>3</sup> ·years | 51  | 0.8 | (0.53–1.45) |
| Breast cancer (76 cases)                     |               |                          |     |     |             |
|                                              | 0 to 0.05     | mg/m <sup>3</sup> ·years | 36  | 1.0 | –           |
|                                              | > 0.05 to 2.9 | mg/m <sup>3</sup> ·years | 22  | 0.5 | (0.30–1.14) |
|                                              | > 2.9         | mg/m <sup>3</sup> ·years | 18  | 0.5 | (0.26–1.21) |

Table S4. Cox model estimates of the hazard ratio for selected cancer outcomes associated with exposure to synthetic metalworking fluids, controlling for other fluid types, calendar year, calendar year of hire, age, race, sex, and plant.

|                             |     |                          | Number of cases | HR  | 95% CI      |
|-----------------------------|-----|--------------------------|-----------------|-----|-------------|
| Laryngeal cancer (73 cases) |     |                          |                 |     |             |
|                             | 0   | mg/m <sup>3</sup> ·years | 54              | 1.0 | –           |
|                             | > 0 | mg/m <sup>3</sup> ·years | 19              | 1.3 | (0.67–2.78) |
| Lung cancer (1891 cases)    |     |                          |                 |     |             |
|                             | 0   | mg/m <sup>3</sup> ·years | 1374            | 1.0 | –           |

|                               |              |                          |     |          |             |
|-------------------------------|--------------|--------------------------|-----|----------|-------------|
|                               | > 0 to 0.3   | mg/m <sup>3</sup> ·years | 173 | 0.9<br>3 | (0.77–1.12) |
|                               | > 0.3 to 1.4 | mg/m <sup>3</sup> ·years | 172 | 1.0<br>7 | (0.89–1.29) |
|                               | > 1.4        | mg/m <sup>3</sup> ·years | 172 | 1.0<br>0 | (0.84–1.20) |
| Esophageal cancer (176 cases) |              |                          |     |          |             |
|                               | 0            | mg/m <sup>3</sup> ·years | 126 | 1.0<br>0 | –           |
|                               | > 0 to 0.7   | mg/m <sup>3</sup> ·years | 25  | 1.1<br>3 | (0.66–1.96) |
|                               | > 0.7        | mg/m <sup>3</sup> ·years | 25  | 1.3<br>9 | (0.84–2.30) |
| Stomach cancer (192 cases)    |              |                          |     |          |             |
|                               | 0            | mg/m <sup>3</sup> ·years | 149 | 1.0<br>0 | –           |
|                               | > 0 to 0.5   | mg/m <sup>3</sup> ·years | 22  | 1.0<br>6 | (0.61–1.84) |
|                               | > 0.5        | mg/m <sup>3</sup> ·years | 21  | 0.9<br>0 | (0.53–1.56) |
| Colon cancer (407 cases)      |              |                          |     |          |             |
|                               | 0            | mg/m <sup>3</sup> ·years | 310 | 1.0<br>0 | –           |
|                               | > 0 to 0.4   | mg/m <sup>3</sup> ·years | 33  | 0.7<br>9 | (0.52–1.21) |
|                               | > 0.4 to 1.7 | mg/m <sup>3</sup> ·years | 32  | 0.9<br>8 | (0.65–1.50) |
|                               | > 1.7        | mg/m <sup>3</sup> ·years | 32  | 0.9<br>2 | (0.62–1.38) |
| Rectal cancer (83 cases)      |              |                          |     |          |             |
|                               | 0            | mg/m <sup>3</sup> ·years | 59  | 1.0<br>0 | –           |
|                               | > 0 to 0.8   | mg/m <sup>3</sup> ·years | 12  | 1.4<br>9 | (0.67–3.27) |
|                               | > 0.8        | mg/m <sup>3</sup> ·years | 12  | 1.6<br>4 | (0.79–3.41) |
| Bladder cancer (138 cases)    |              |                          |     |          |             |
|                               | 0            | mg/m <sup>3</sup> ·years | 104 | 1.0<br>0 | –           |
|                               | > 0 to 0.5   | mg/m <sup>3</sup> ·years | 17  | 0.9<br>1 | (0.49–1.70) |
|                               | > 0.5        | mg/m <sup>3</sup> ·years | 17  | 0.6<br>7 | (0.37–1.21) |
| Liver cancer (123 cases)      |              |                          |     |          |             |
|                               | 0            | mg/m <sup>3</sup> ·years | 89  | 1.0<br>0 | –           |



|                                              |              |                          |     |          |             |
|----------------------------------------------|--------------|--------------------------|-----|----------|-------------|
|                                              | > 0 to 0.4   | mg/m <sup>3</sup> ·years | 17  | 1.1<br>7 | (0.60–2.26) |
|                                              | > 0.4        | mg/m <sup>3</sup> ·years | 17  | 0.8<br>8 | (0.48–1.63) |
| Pancreatic cancer (315 cases)                |              |                          |     |          |             |
|                                              | 0            | mg/m <sup>3</sup> ·years | 227 | 1.0<br>0 | –           |
|                                              | > 0 to 0.3   | mg/m <sup>3</sup> ·years | 30  | 0.9<br>8 | (0.62–1.55) |
|                                              | > 0.3 to 0.9 | mg/m <sup>3</sup> ·years | 29  | 1.2<br>6 | (0.80–2.00) |
|                                              | > 0.9        | mg/m <sup>3</sup> ·years | 29  | 0.8<br>7 | (0.56–1.34) |
| Skin cancer (69 cases)                       |              |                          |     |          |             |
|                                              | 0            | mg/m <sup>3</sup> ·years | 52  | 1.0<br>0 | –           |
|                                              | > 0          | mg/m <sup>3</sup> ·years | 17  | 0.6<br>7 | (0.34–1.31) |
| Prostate cancer (417 cases)                  |              |                          |     |          |             |
|                                              | 0            | mg/m <sup>3</sup> ·years | 300 | 1.0<br>0 | –           |
|                                              | > 0 to 0.5   | mg/m <sup>3</sup> ·years | 39  | 1.0<br>1 | (0.67–1.50) |
|                                              | > 0.5 to 2   | mg/m <sup>3</sup> ·years | 39  | 1.1<br>3 | (0.76–1.68) |
|                                              | > 2          | mg/m <sup>3</sup> ·years | 39  | 1.3<br>0 | (0.89–1.89) |
| Brain and nervous system cancers (128 cases) |              |                          |     |          |             |
|                                              | 0            | mg/m <sup>3</sup> ·years | 94  | 1.0<br>0 | –           |
|                                              | > 0 to 0.6   | mg/m <sup>3</sup> ·years | 17  | 1.5<br>2 | (0.80–2.91) |
|                                              | > 0.6        | mg/m <sup>3</sup> ·years | 17  | 1.3<br>6 | (0.75–2.47) |
| Leukemia (200 cases)                         |              |                          |     |          |             |
|                                              | 0            | mg/m <sup>3</sup> ·years | 142 | 1.0<br>0 | –           |
|                                              | > 0 to 0.9   | mg/m <sup>3</sup> ·years | 29  | 1.1<br>1 | (0.67–1.82) |
|                                              | > 0.9        | mg/m <sup>3</sup> ·years | 29  | 1.3<br>7 | (0.86–2.19) |
| Breast cancer (76 cases)                     |              |                          |     |          |             |
|                                              | 0            | mg/m <sup>3</sup> ·years | 60  | 1.0<br>0 | –           |
|                                              | > 0          | mg/m <sup>3</sup> ·years | 16  | 0.7<br>6 | (0.38–1.53) |

---
